# Supplementary material
Source: PubMed Central journal article supplement (PMC4128235)
Supplement: NIHMS618695-supplement-Supplementary_Figures_and_Tables.pdf [file NIHMS618695-supplement-Supplementary_Figures_and_Tables.pdf]

# Supplementary Figure 1

## ZKSCAN3 (ZNF306) ECgene Summary (<http://genome.ewha.ac.kr/ECgene/>)

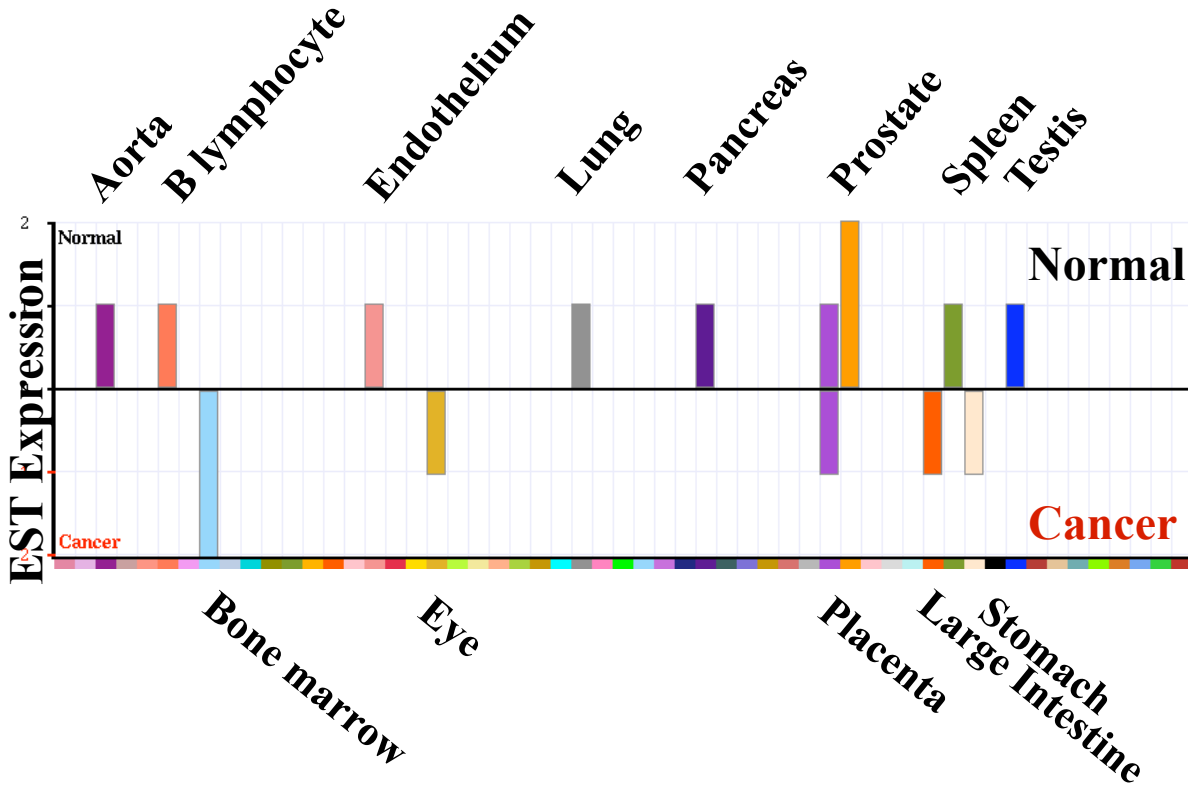

## Supplementary Figure 2A

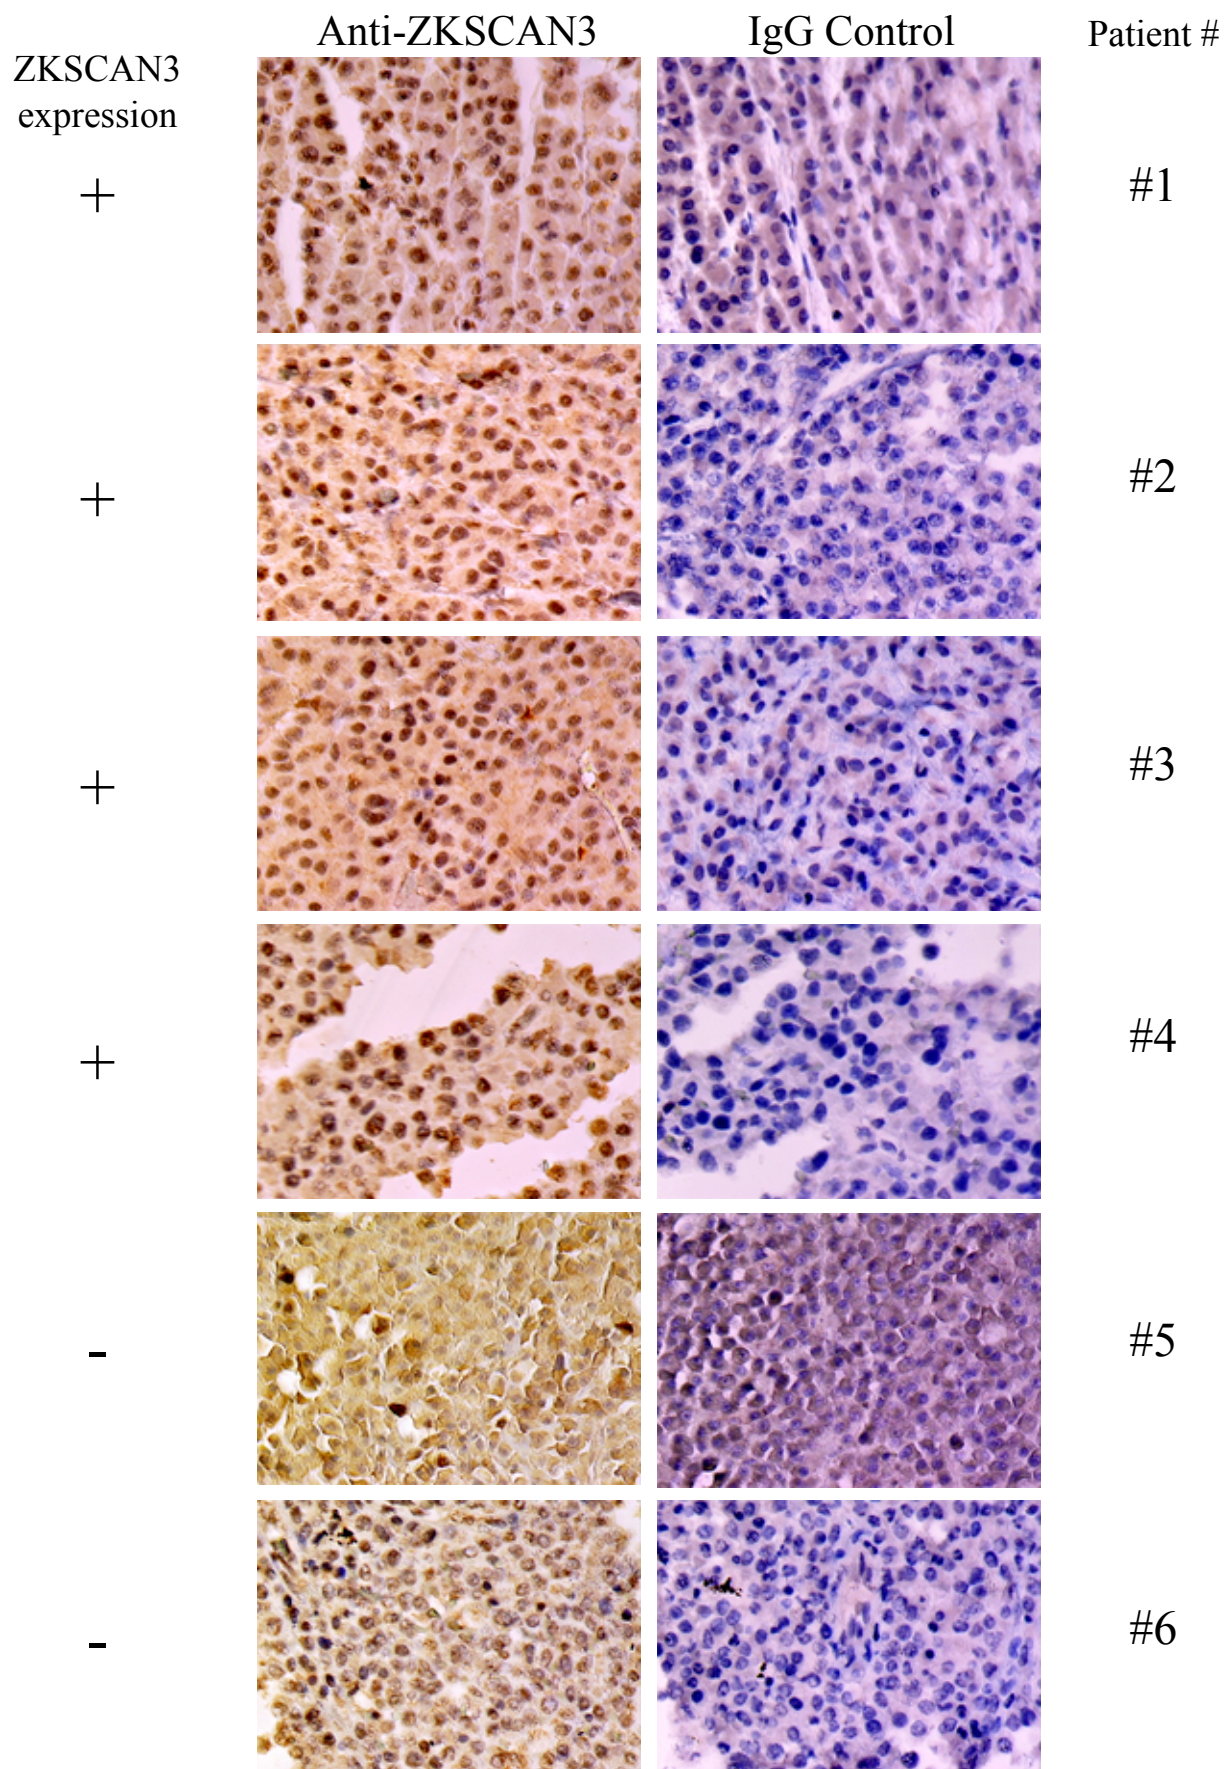



|                            | Anti-ZKSCAN3                                                                        | IgG Control                                                                          | Patient # |
|----------------------------|-------------------------------------------------------------------------------------|--------------------------------------------------------------------------------------|-----------|
| ZKSCAN3<br>expression<br>+ | 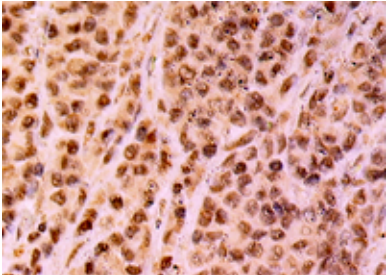   |    | #7        |
| +                          |    |    | #8        |
| +                          |   |   | #9        |
| +                          |  |  | #10       |
| -                          |  |  | #11       |
| -                          |  |  | #12       |



## Supplementary Figure 2B

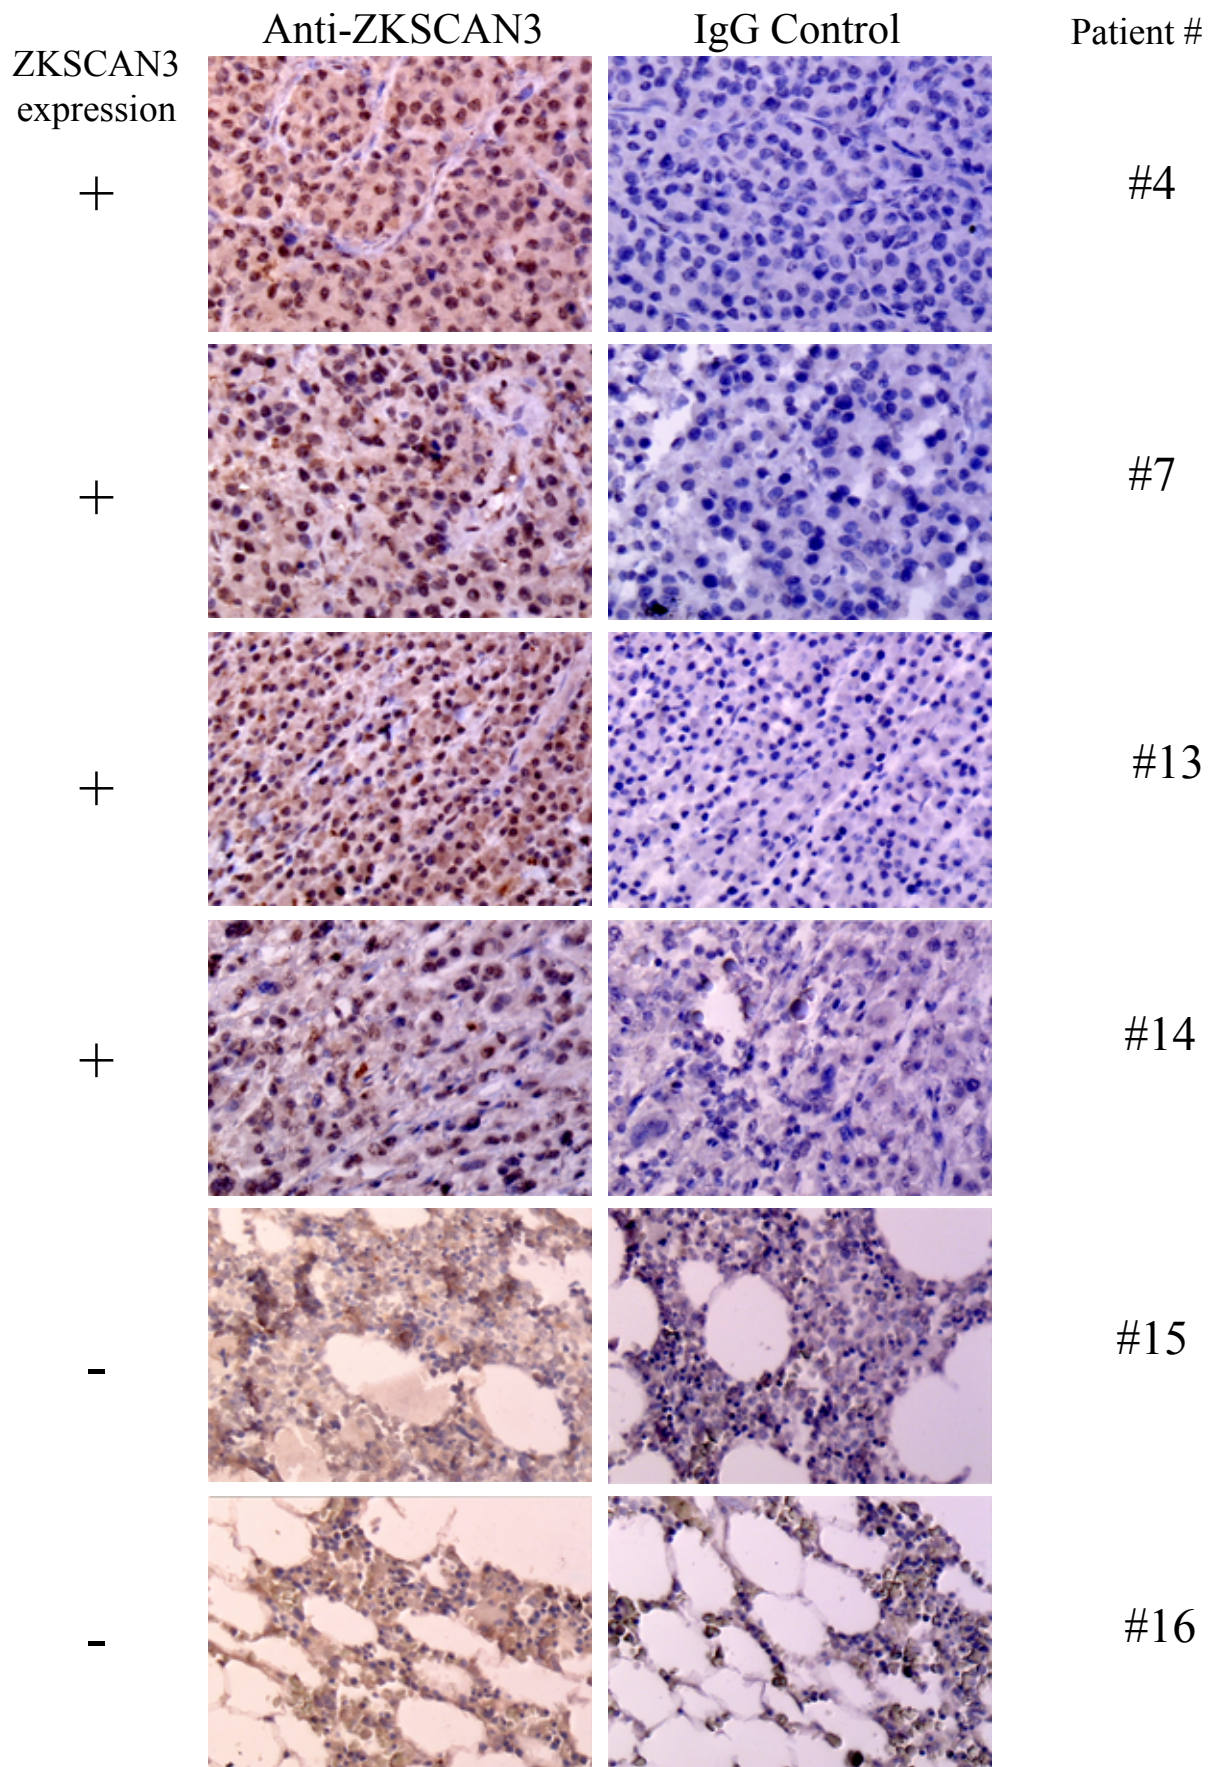

# Supplementary Figure 3A

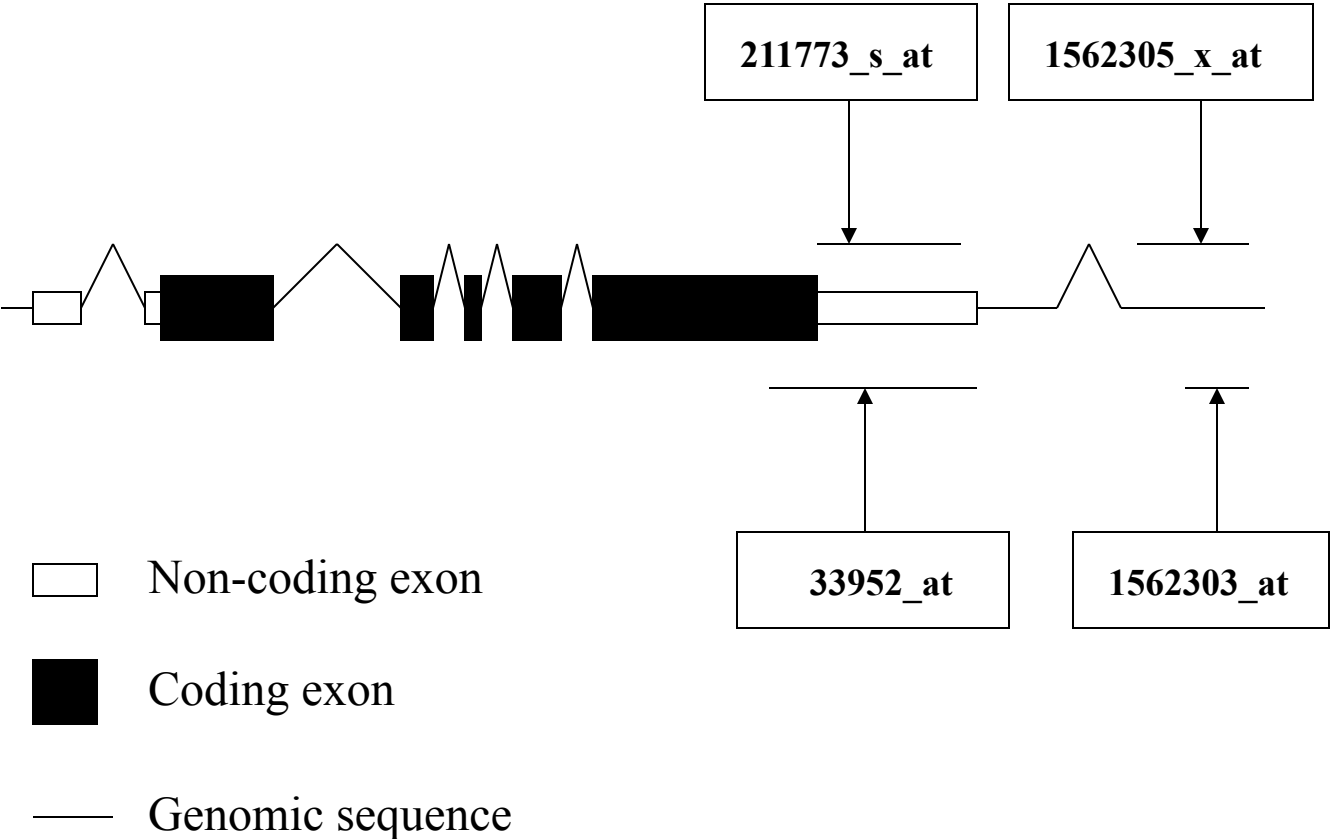

## Supplementary Figure 3B

### **ZKSCAN3 Expression in Zhan Myeloma 2**

Reporter: 211773\_s\_at

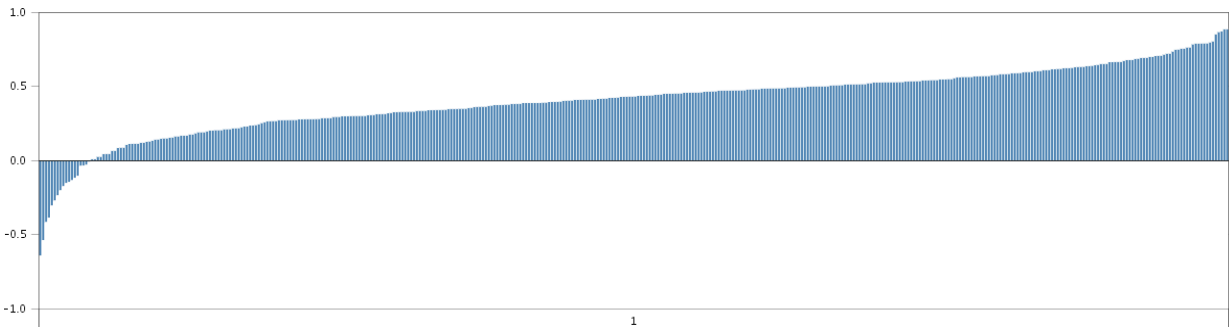

Positive *ZKSCAN3* expression: 95.2% (394/414)

### **ZKSCAN3 Expression in Tian Myeloma**

Reporter: 33952\_at

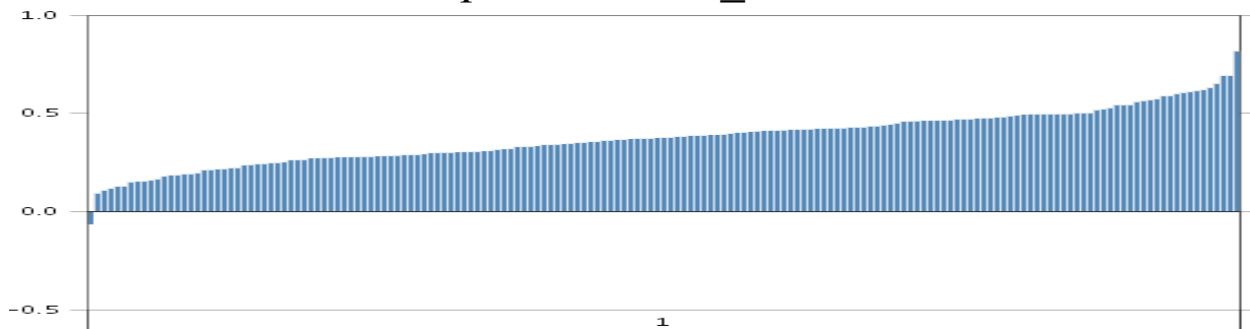

Positive *ZKSCAN3* expression: 99.4% (172/173)

### **ZKSCAN3 Expression in Angelli Myeloma\_1**

Reporter: 211773\_s\_at

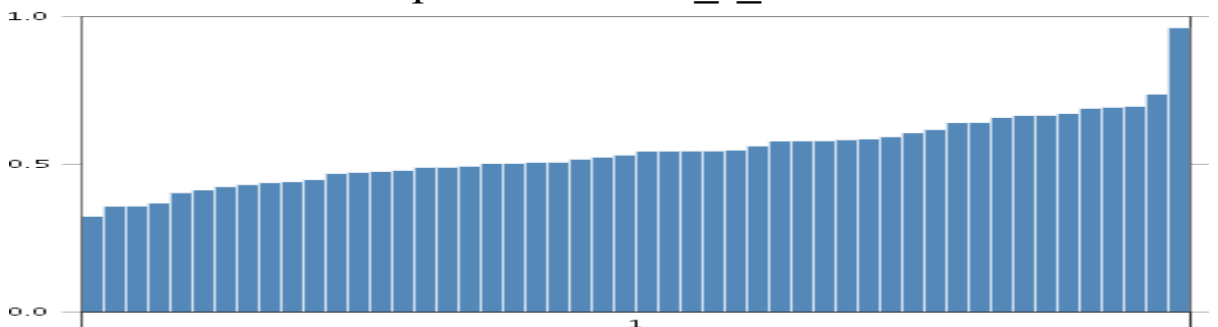

Positive *ZKSCAN3* expression: 100% (50/50)

### **ZKSCAN3 Expression in Carrasco Myeloma**

Reporter: 211773\_s\_at

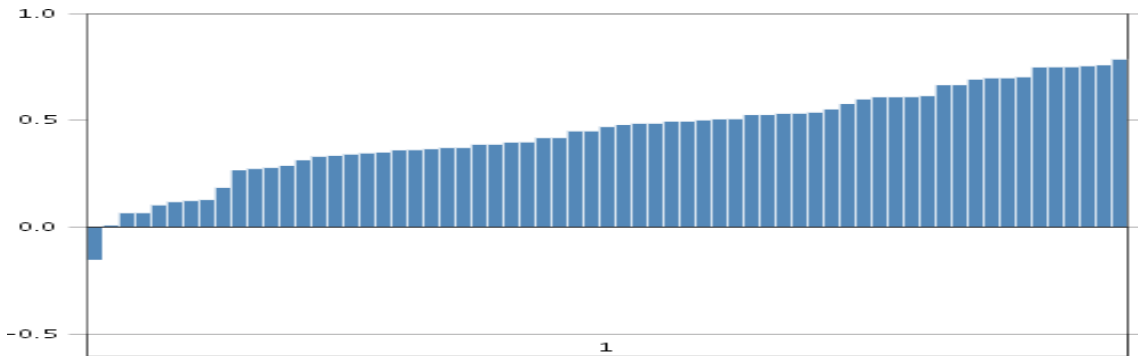

Positive *ZKSCAN3* expression: 96.9% (63/65)

### **ZKSCAN3 Expression in Angelli Myeloma\_2**

Reporter: 211773\_s\_at

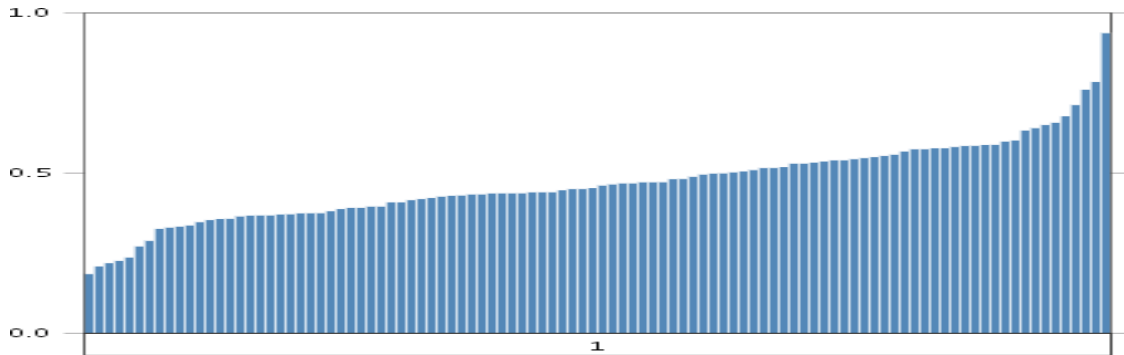

Positive *ZKSCAN3* expression: 100% (102/102)

### **ZKSCAN3 Expression in Burington Myeloma**

Reporter: 33952\_at

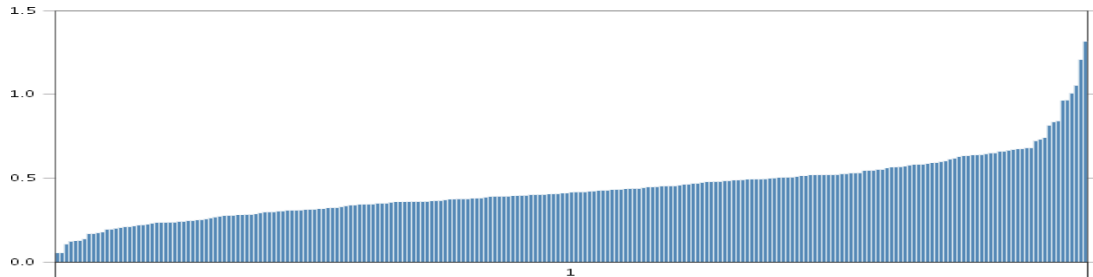

Positive *ZKSCAN3* expression: 100% (229/229)

# ***ZKSCAN3* Expression in Mulligan Myeloma**

Reporter: 211773\_s\_at

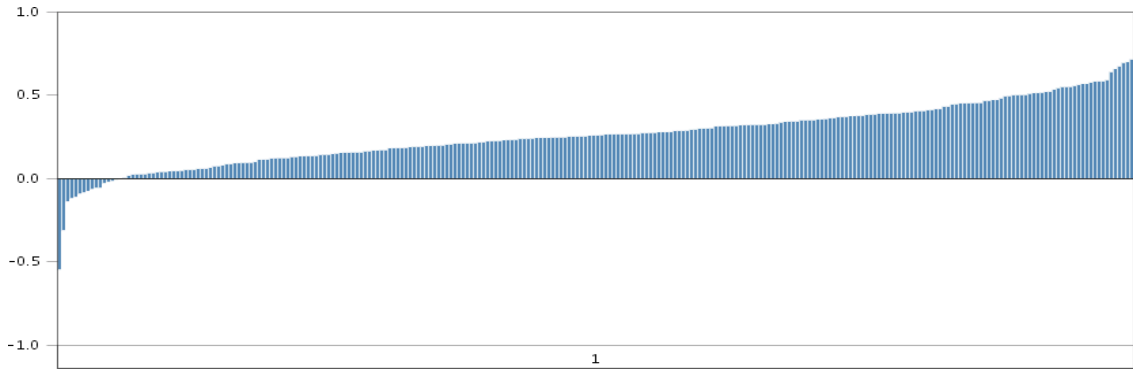

Positive *ZKSCAN3* expression: 93.9% (248/264)



# Supplementary Figure 4A

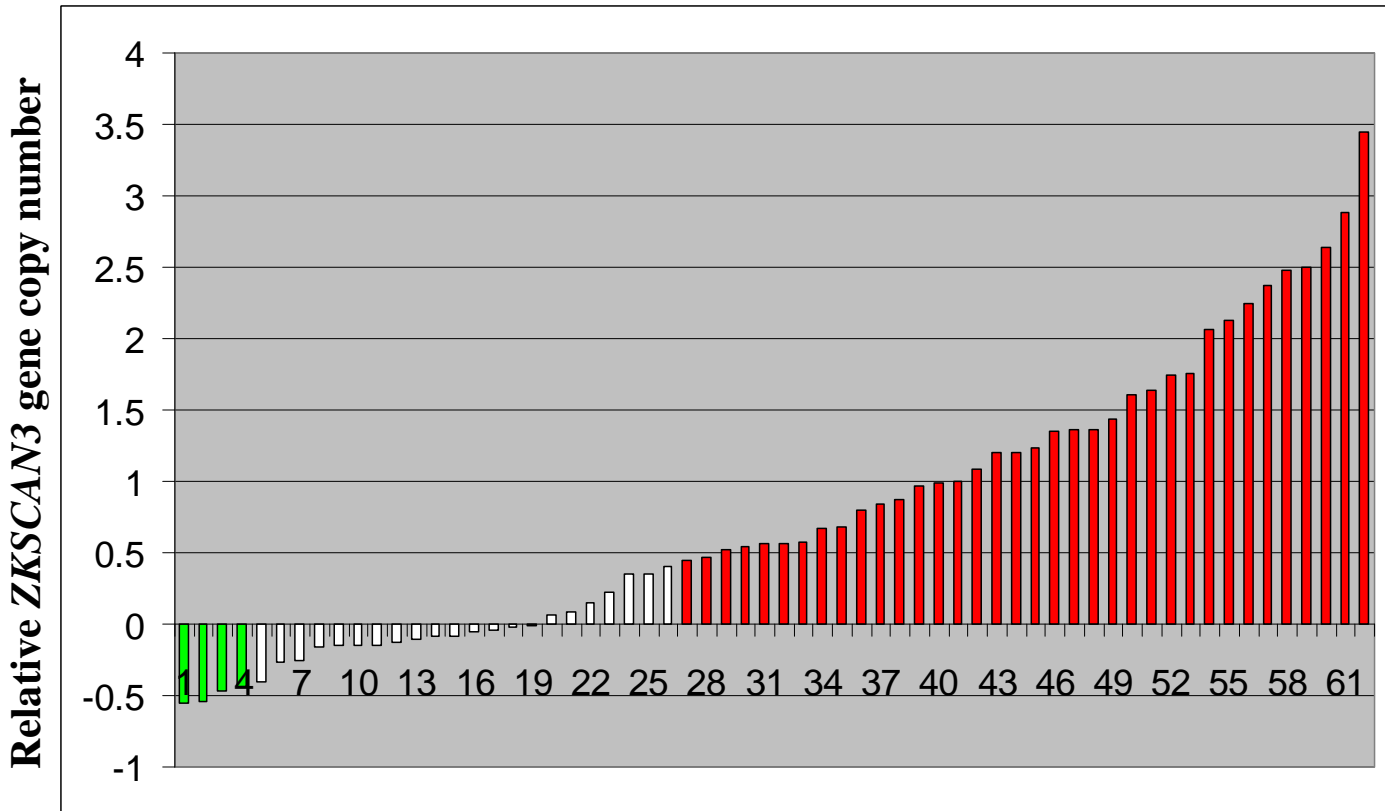

**Green bar: copy number decrease**

**White bar: copy number no change**

**Red bar: copy number increase**

## Supplementary Figure 4B

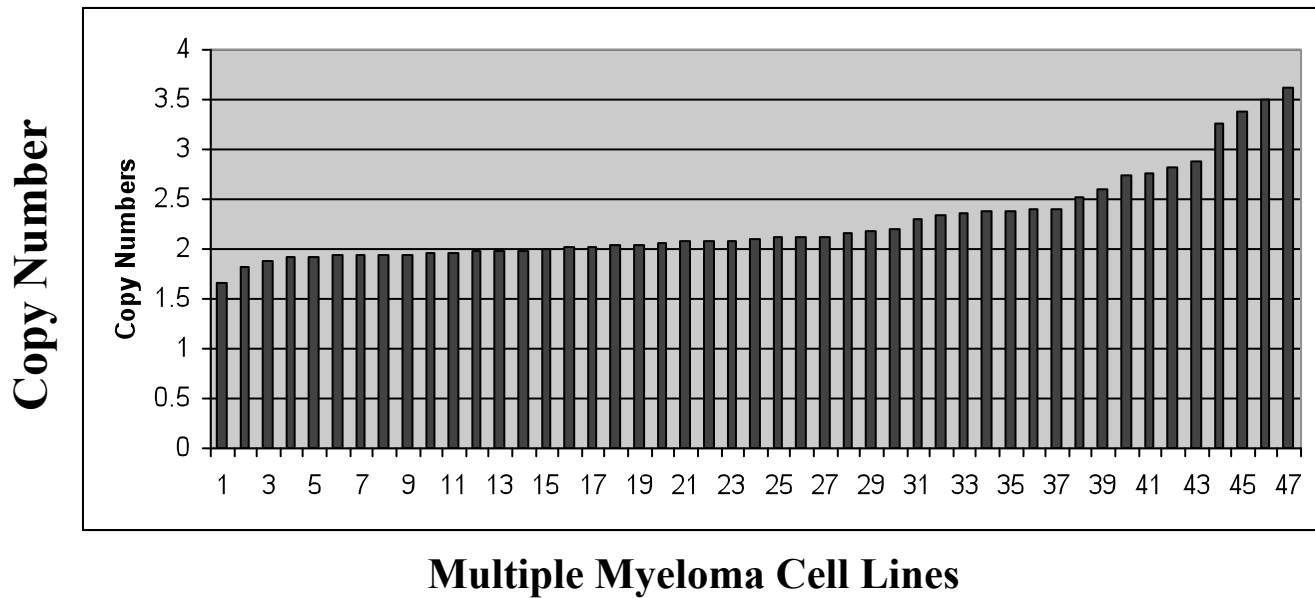

| 6p22.1 Region Copy Number | Number of Cell Lines (total 47) | %    |
|---------------------------|---------------------------------|------|
| <1.0                      | 0                               | 0    |
| 1.0-1.5                   | 0                               | 0    |
| 1.5-2.0                   | 14                              | 29.8 |
| 2.0-2.5                   | 23                              | 48.9 |
| 2.5-3.0                   | 6                               | 12.8 |
| >3.0                      | 4                               | 8.5  |

Note:

Cell line #47: RPMI 8226



## Supplementary Figure 5B

| <b>Motif Location at Promoter</b> | <b>Sequence</b>       | <b>DNA Strand</b> |
|-----------------------------------|-----------------------|-------------------|
| <b>-482 to -495</b>               | <b>AAATCACCCCCTCC</b> | <b>-</b>          |
| <b>-677 to -690</b>               | <b>AAGCACCCCCTTC</b>  | <b>-</b>          |
| <b>-1003 to -1016</b>             | <b>GAAGGGGTGGTGGT</b> | <b>+</b>          |



## Supplementary Figure 6A

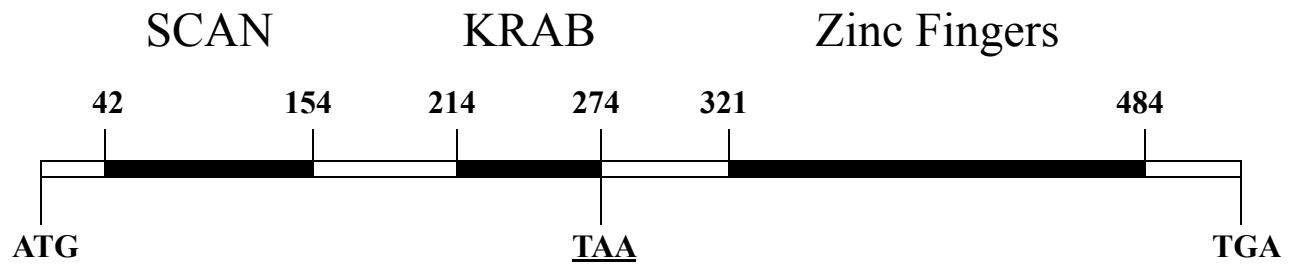

---

32.18 kDa (including FLAG)

---

62.17 kDa (including FLAG)

# Supplementary Figure 6B

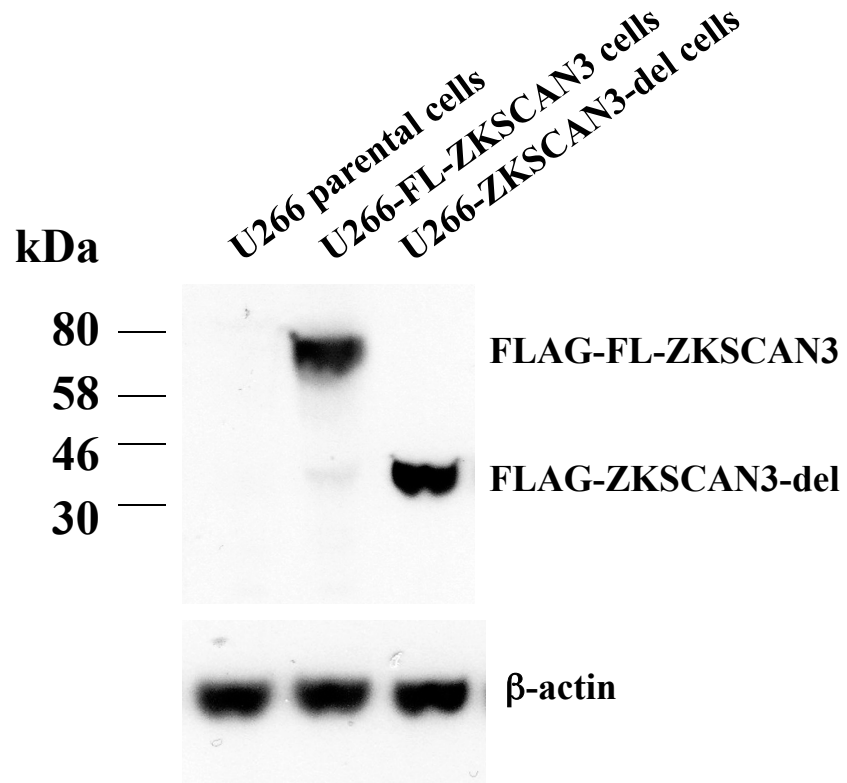

# Supplementary Figure 6C

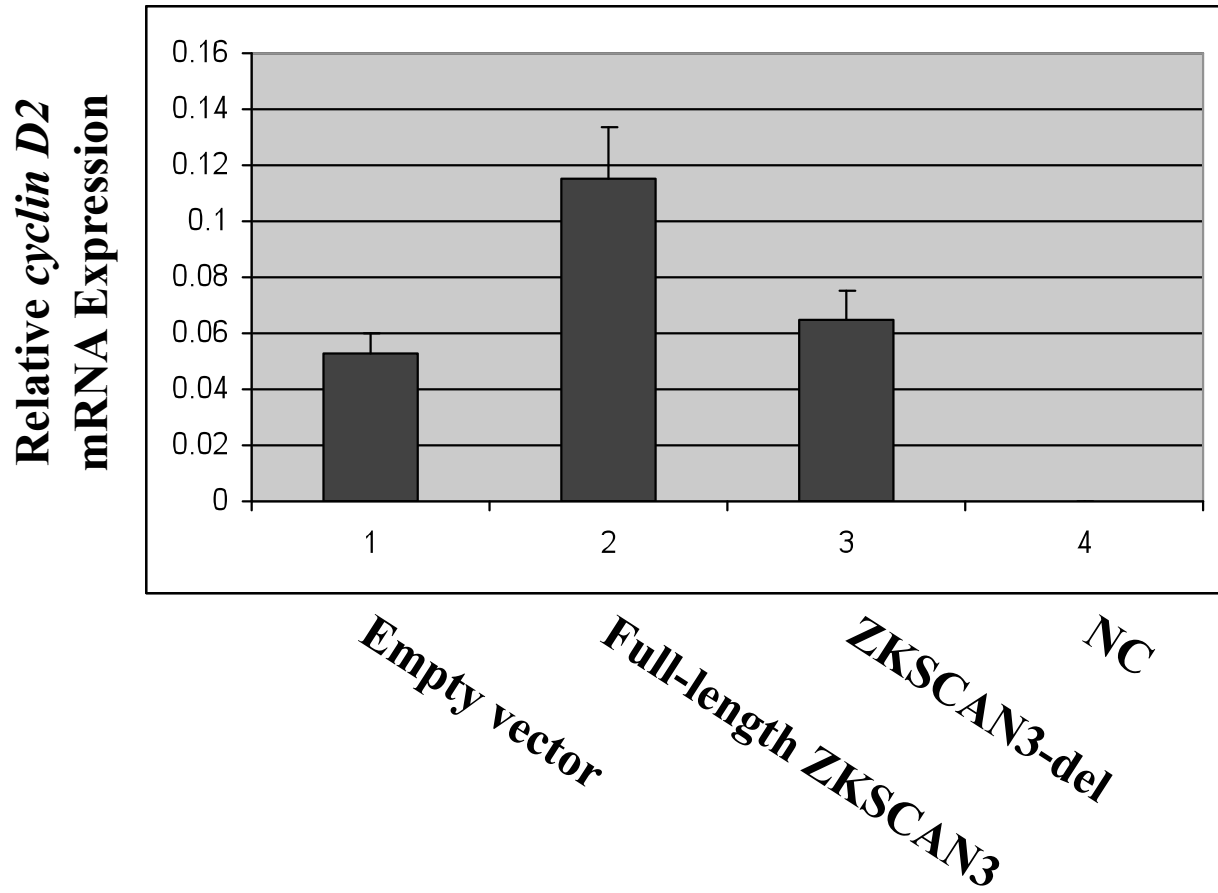

# Supplementary Figure 7A

## RPMI 8226

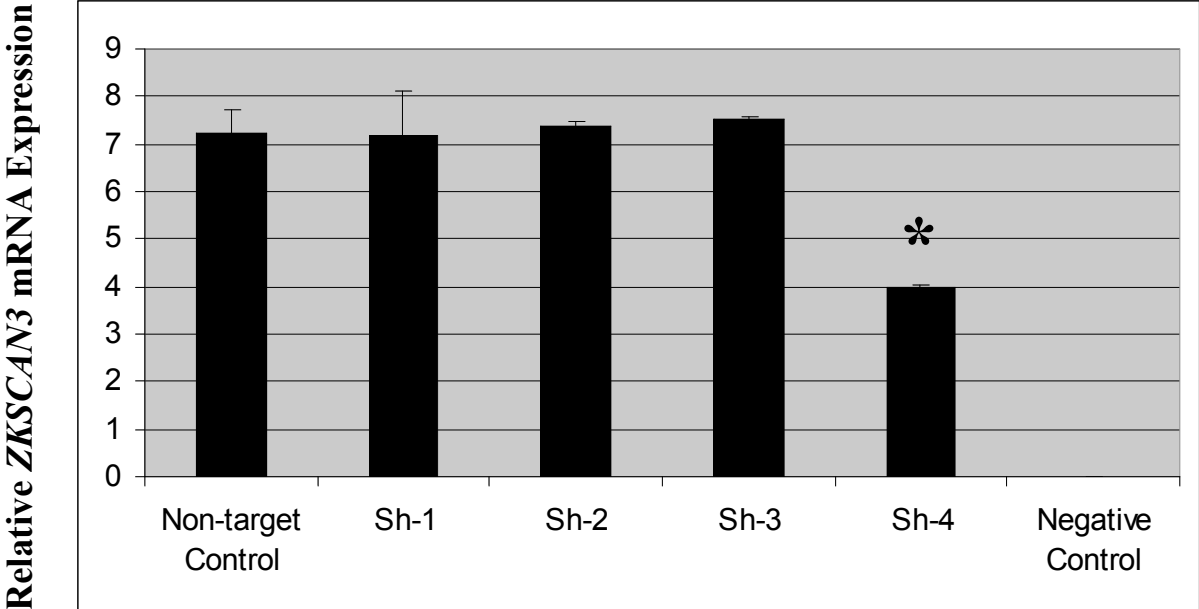

## KAS-6/1

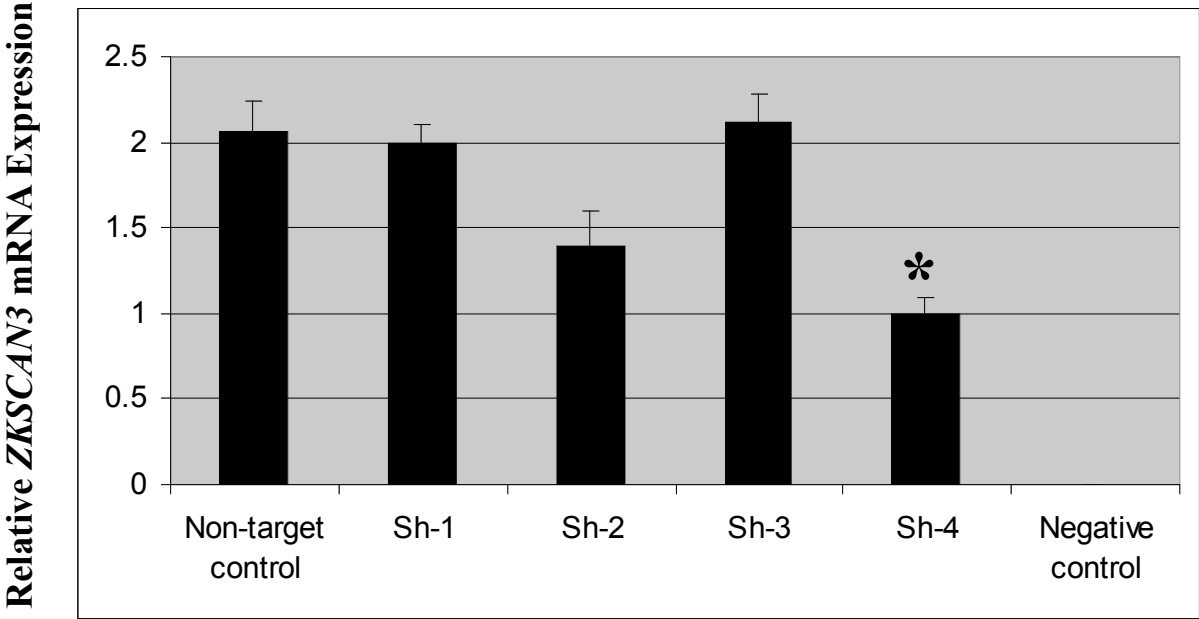



# Supplementary Figure 7B

## RPMI 8226

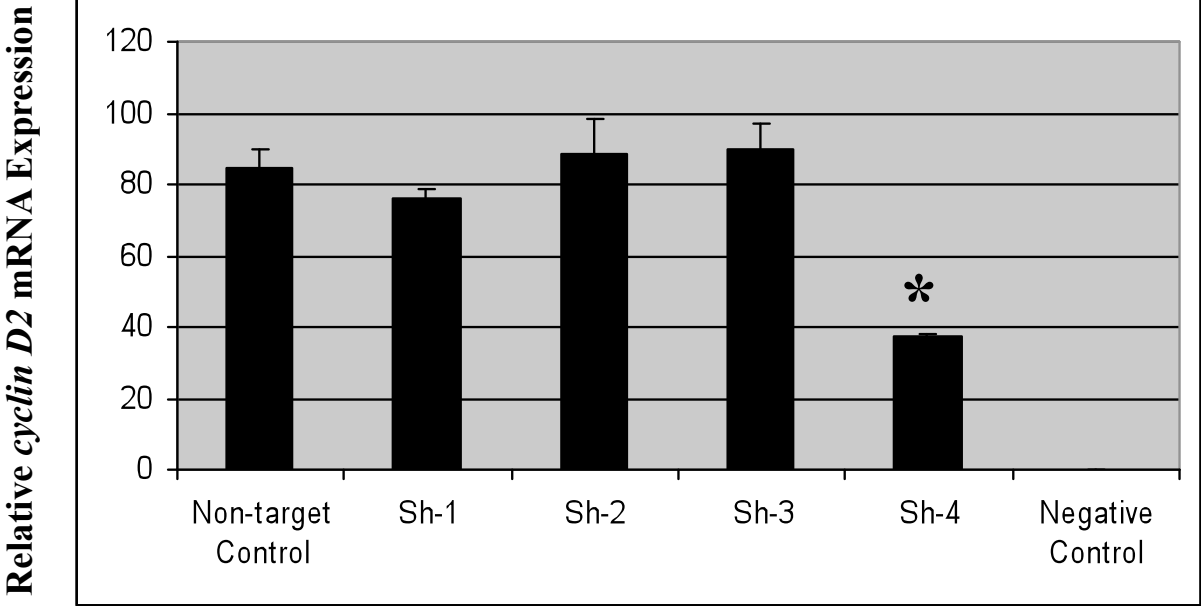

## KAS-6/1

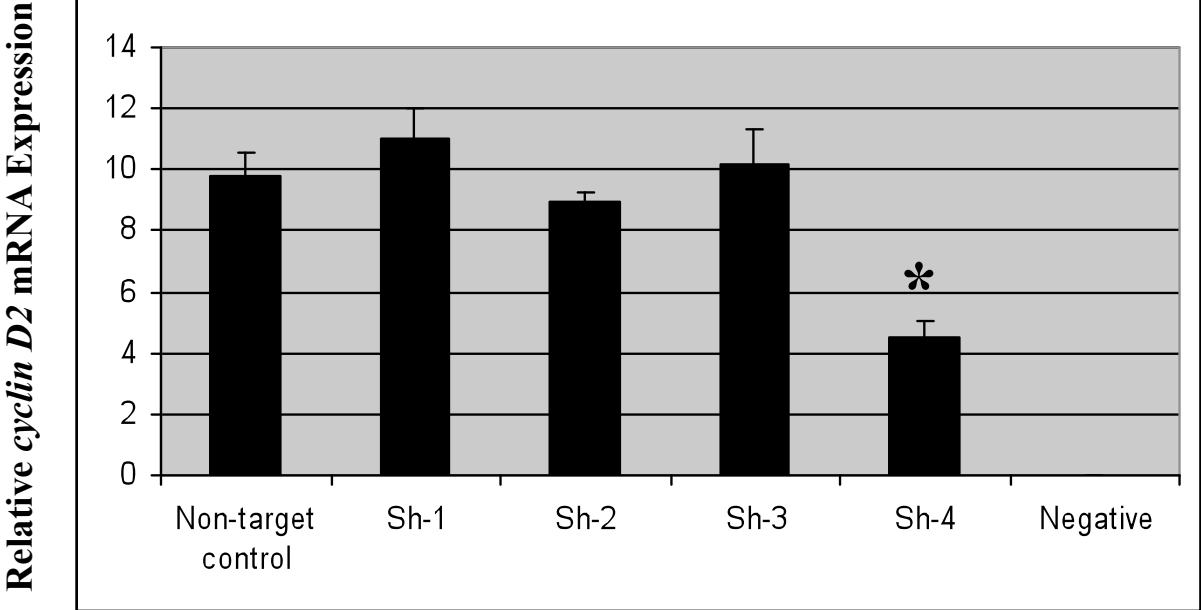

# Supplementary Figure 7C

## KAS-6/1 cells

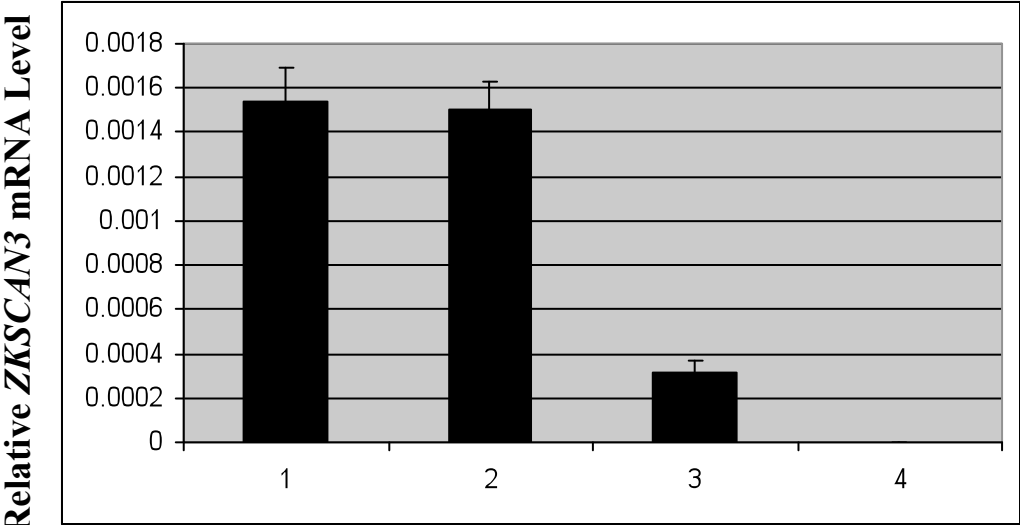

- 1. Parental cells
- 2. Non-targeting shRNA
- 3. shZK3-#1
- 4. Negative control

# Supplementary Figure 7D

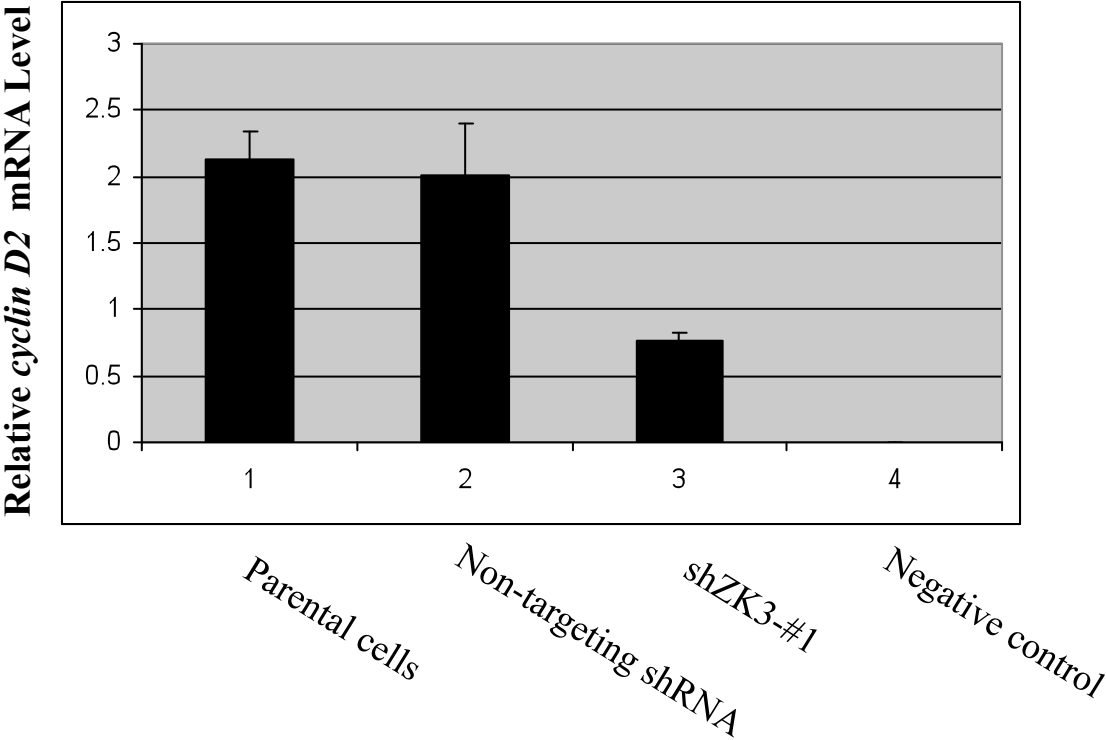

# Supplementary Figure 7E

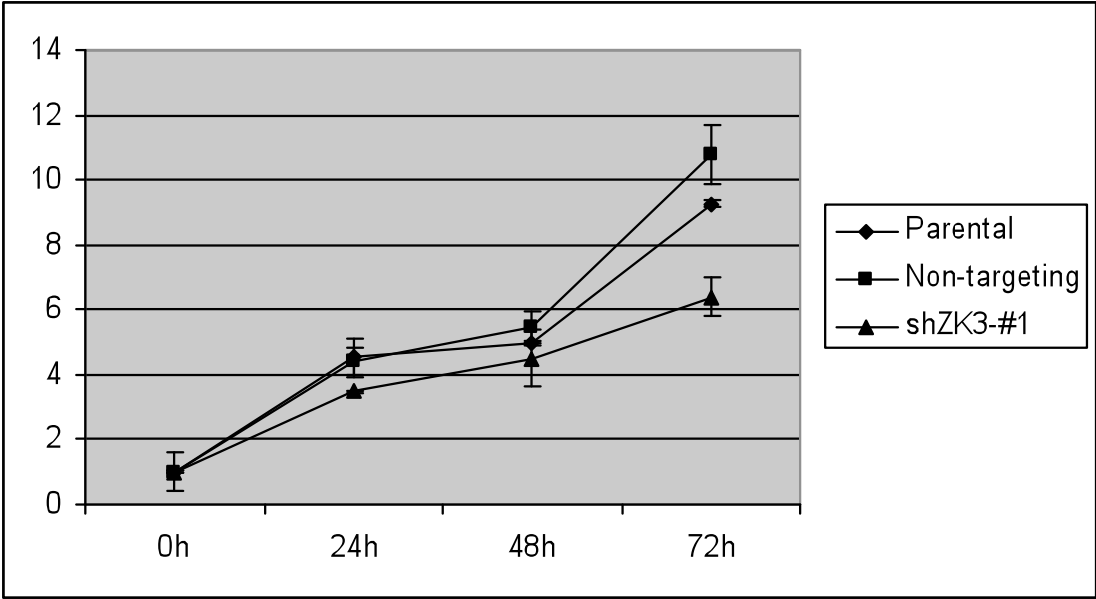



**Probe** A\_14\_P111649  
**PhysicalPosition** 28327784  
**Chromosome** 6p22.1  
**Representative Gene** ZKSCAN3

| Patient number | ZKSCAN3 copy number | Main mode of density plot | Relative gene copy number | Copy number change |
|----------------|---------------------|---------------------------|---------------------------|--------------------|
| MCR-0249_MM    | 1.384562013         | 1.942                     | -0.557437987              | decrease           |
| MCR-0134_MM    | 1.402044325         | 1.942                     | -0.539955675              | decrease           |
| MCR-0051_MM    | 1.470682176         | 1.942                     | -0.471317824              | decrease           |
| MCR-1263_MM    | 1.502511526         | 1.942                     | -0.439488474              | decrease           |
| MCR-0927_MM    | 1.536261401         | 1.942                     | -0.405738599              | no change          |
| MCR-0103_SMM   | 1.674827527         | 1.942                     | -0.267172473              | no change          |
| MCR-0142_MM    | 1.688927663         | 1.942                     | -0.253072337              | no change          |
| MCR-0250_MM    | 1.785295197         | 1.942                     | -0.156704803              | no change          |
| MCR-0200_MM    | 1.788593815         | 1.942                     | -0.153406185              | no change          |
| MCR-0203_MM    | 1.790927196         | 1.942                     | -0.151072804              | no change          |
| MCR-0288_MM    | 1.797366022         | 1.942                     | -0.144633978              | no change          |
| MCR-1105_MM    | 1.809504312         | 1.942                     | -0.132495688              | no change          |
| MCR-0882_MM    | 1.837968005         | 1.942                     | -0.104031995              | no change          |
| MCR-0087_SMM   | 1.852484206         | 1.942                     | -0.089515794              | no change          |
| MCR-0157_MM    | 1.862047477         | 1.942                     | -0.079952523              | no change          |
| MCR-0198_MM    | 1.884232845         | 1.942                     | -0.057767155              | no change          |
| MCR-0263_MM    | 1.898546888         | 1.942                     | -0.043453112              | no change          |
| MCR-0073_MM    | 1.922690858         | 1.942                     | -0.019309142              | no change          |
| MCR-0245_MM    | 1.934945523         | 1.942                     | -0.007054477              | no change          |
| MCR-0061_MM    | 2.008417942         | 1.942                     | 0.066417942               | no change          |
| MCR-0892_MM    | 2.03057562          | 1.942                     | 0.08857562                | no change          |
| MCR-0113_MM    | 2.08665026          | 1.942                     | 0.14465026                | no change          |
| MCR-0318_MM    | 2.168874437         | 1.942                     | 0.226874437               | no change          |
| MCR-0307_MM    | 2.29447363          | 1.942                     | 0.35247363                | no change          |
| MCR-0899_MM    | 2.295065042         | 1.942                     | 0.353065042               | no change          |
| MCR-0912_MM    | 2.35087693          | 1.942                     | 0.40887693                | no change          |
| MCR-1039_MM    | 2.386699629         | 1.942                     | 0.444699629               | increase           |
| MCR-0904_MM    | 2.415081936         | 1.942                     | 0.473081936               | increase           |
| MCR-0433_MM    | 2.465220486         | 1.942                     | 0.523220486               | increase           |
| MCR-0822_MM    | 2.487342243         | 1.942                     | 0.545342243               | increase           |
| MCR-0994_MM    | 2.502903358         | 1.942                     | 0.560903358               | increase           |

|              |             |       |             |          |
|--------------|-------------|-------|-------------|----------|
| MCR-1136_MM  | 2.507513396 | 1.942 | 0.565513396 | increase |
| MCR-0264_MM  | 2.511916001 | 1.942 | 0.569916001 | increase |
| MCR-0417_SMM | 2.609840031 | 1.942 | 0.667840031 | increase |
| MCR-1035_MM  | 2.627941096 | 1.942 | 0.685941096 | increase |
| MCR-1194_MM  | 2.736373632 | 1.942 | 0.794373632 | increase |
| MCR-0940_SMM | 2.786018861 | 1.942 | 0.844018861 | increase |
| MCR-0427_MM  | 2.812295366 | 1.942 | 0.870295366 | increase |
| MCR-0400_SMM | 2.910554393 | 1.942 | 0.968554393 | increase |
| MCR-0217_MM  | 2.927767261 | 1.942 | 0.985767261 | increase |
| MCR-1055_MM  | 2.941083467 | 1.942 | 0.999083467 | increase |
| MCR-0390_MM  | 3.026995818 | 1.942 | 1.084995818 | increase |
| MCR-1215_MM  | 3.143457533 | 1.942 | 1.201457533 | increase |
| MCR-0297_MM  | 3.149211937 | 1.942 | 1.207211937 | increase |
| MCR-1098_MM  | 3.179854359 | 1.942 | 1.237854359 | increase |
| MCR-0059_MM  | 3.292730179 | 1.942 | 1.350730179 | increase |
| MCR-0959_MM  | 3.299421355 | 1.942 | 1.357421355 | increase |
| MCR-0999_MM  | 3.302930876 | 1.942 | 1.360930876 | increase |
| MCR-1000_MM  | 3.382878795 | 1.942 | 1.440878795 | increase |
| MCR-1082_MM  | 3.552691257 | 1.942 | 1.610691257 | increase |
| MCR-1028_MM  | 3.581263728 | 1.942 | 1.639263728 | increase |
| MCR-1026_MM  | 3.691344061 | 1.942 | 1.749344061 | increase |
| MCR-1273_MM  | 3.694252144 | 1.942 | 1.752252144 | increase |
| MCR-1144_SMM | 4.001606971 | 1.942 | 2.059606971 | increase |
| MCR-0890_MM  | 4.07091863  | 1.942 | 2.12891863  | increase |
| MCR-0373_MM  | 4.186848403 | 1.942 | 2.244848403 | increase |
| MCR-1092_MM  | 4.315784522 | 1.942 | 2.373784522 | increase |
| MCR-1183_SMM | 4.419538189 | 1.942 | 2.477538189 | increase |
| MCR-0426_SMM | 4.44101302  | 1.942 | 2.49901302  | increase |
| MCR-1190_MM  | 4.57752057  | 1.942 | 2.63552057  | increase |
| MCR-1189_MM  | 4.829075411 | 1.942 | 2.887075411 | increase |
| MCR-0319_SMM | 5.394019444 | 1.942 | 3.452019444 | increase |

|    | Cell Line | Chromosome | Start.bp | End.bp    | Seg.CN      |
|----|-----------|------------|----------|-----------|-------------|
| 1  | KHM11     | 6          | 8007797  | 117884012 | 1.660522869 |
| 2  | JK6L      | 6          | 204528   | 109282106 | 1.816313481 |
| 3  | FR4       | 6          | 204528   | 170809875 | 1.888671408 |
| 4  | OPM2      | 6          | 204528   | 32047749  | 1.918808353 |
| 5  | MM_M1     | 6          | 204528   | 170809875 | 1.923931494 |
| 6  | KMS34     | 6          | 204528   | 87782433  | 1.933963838 |
| 7  | KMS11     | 6          | 204528   | 30737615  | 1.944024931 |
| 8  | L363      | 6          | 204528   | 76400079  | 1.944645479 |
| 9  | XG2       | 6          | 204528   | 46671760  | 1.947078177 |
| 10 | OCIMY1    | 6          | 204528   | 96591731  | 1.969085072 |
| 11 | NCIH929   | 6          | 204528   | 160083897 | 1.96928338  |
| 12 | MM1R      | 6          | 204528   | 30227680  | 1.978377205 |
| 13 | INA6      | 6          | 204528   | 94008139  | 1.979314171 |
| 14 | OCIMY5    | 6          | 204528   | 109827926 | 1.987321362 |
| 15 | CAG       | 6          | 204528   | 62040890  | 2.009172573 |
| 16 | XG1       | 6          | 204528   | 32905664  | 2.010145489 |
| 17 | U266      | 6          | 204528   | 94085300  | 2.015657528 |
| 18 | DELTA47   | 6          | 4756355  | 36761482  | 2.043173731 |
| 19 | KARPAS620 | 6          | 204528   | 170809875 | 2.049591211 |
| 20 | SKMM1     | 6          | 204528   | 85037370  | 2.06552464  |
| 21 | ANBL6     | 6          | 204528   | 54055870  | 2.072858015 |
| 22 | KMS28PE   | 6          | 204528   | 119414707 | 2.083871984 |
| 23 | MM1S      | 6          | 204528   | 54162600  | 2.085580713 |
| 24 | KMS12BM   | 6          | 28218866 | 45181689  | 2.098015736 |
| 25 | FLAM76    | 6          | 204528   | 170809875 | 2.116358261 |
| 26 | OCIMY7    | 6          | 945019   | 39969922  | 2.119718782 |
| 27 | SKMM2     | 6          | 204528   | 93398769  | 2.120876503 |
| 28 | UTMC2     | 6          | 204528   | 30021894  | 2.154301246 |
| 29 | KMS12PE   | 6          | 1799987  | 170809875 | 2.182346833 |
| 30 | KMS28BM   | 6          | 204528   | 63255895  | 2.203281379 |
| 31 | KMS26     | 6          | 204528   | 49927967  | 2.293619683 |
| 32 | PE2       | 6          | 204528   | 170809875 | 2.335780078 |
| 33 | KMS20     | 6          | 21306265 | 44079986  | 2.359292504 |
| 34 | KMS18     | 6          | 26203196 | 44523059  | 2.370570578 |
| 35 | JJN3      | 6          | 14086214 | 31739156  | 2.370704893 |
| 35 | OPM1      | 6          | 204528   | 31652497  | 2.401546858 |
| 37 | LP1       | 6          | 945019   | 75949831  | 2.405989538 |
| 38 | SACHI     | 6          | 204528   | 76607743  | 2.527941812 |
| 39 | XG6       | 6          | 22396956 | 43604720  | 2.591810555 |
| 40 | JIM3      | 6          | 7340313  | 58721961  | 2.739265804 |
| 41 | PE1       | 6          | 204528   | 42669962  | 2.76863423  |
| 42 | ARP1      | 6          | 26342645 | 29866766  | 2.815265862 |
| 43 | H1112     | 6          | 204528   | 57838399  | 2.882678789 |
| 44 | KHM1B     | 6          | 24106527 | 43702997  | 3.254735582 |
| 45 | KMM1      | 6          | 26125251 | 35211613  | 3.374869881 |
| 46 | EJM       | 6          | 204528   | 30805992  | 3.507362684 |
| 47 | RPMI8226  | 6          | 20954331 | 31611211  | 3.610380956 |
